# Supplementary material for: Angular vs. circular: the role of shapes on food packaging graphics in purchase intentions, perceived healthiness, and self-construal
Source: Frontiers journal article supplement (doi:10.3389/fsufs.2025.1512655), 2025-07-17
Supplement: Table_1.docx [file Table_1.docx]

| TABLE 1. Statistics descriptive results in Experiment 1 | | | | |
| --- | --- | --- | --- | --- |
| N=258, 64.7% females, 35.3% males, Mage = 32.72 years, SD = 10.768 | | | | |
|  | M(SD) | |  |  |
| Variable | Angular | Circular | fd | p |
| Purchase Intention | 5.087(0.648) | 4.443(0.912) | F [1, 256] =42.941 | .000 |
| Product Familiarity | 5.703(0.957) | 5.510(0.892) | F [1, 256] = 15.04 | .107 |
