# Supplementary material for: Angular vs. circular: the role of shapes on food packaging graphics in purchase intentions, perceived healthiness, and self-construal
Source: Frontiers journal article supplement (doi:10.3389/fsufs.2025.1512655), 2025-07-17
Supplement: Table_2.docx [file Table_2.docx]

| TABLE 2. Statistics descriptive results in Experiment 2 | | | | |
| --- | --- | --- | --- | --- |
| N=231, 51.1% females, 48.9% males, Mage = 32.59 years, SD = 9.543 | | | | |
|  | M(SD) | |  |  |
| Variable | Angular | Circular | fd | p |
| Product Evaluation | 5.020(0.551) | 4.743(0.888) | F [1, 229] =8.067 | .005 |
