# Supplementary material for: Angular vs. circular: the role of shapes on food packaging graphics in purchase intentions, perceived healthiness, and self-construal
Source: Frontiers journal article supplement (doi:10.3389/fsufs.2025.1512655), 2025-07-17
Supplement: Table_3.docx [file Table_3.docx]

| TABLE 3. Self-construal Stimuli Used in Experiment 3 | |
| --- | --- |
| Independent self-construal | Interdependent self-construal |
| Please reflect on your expectations for yourself. | Please reflect on your family's or friends' expectations for you. |
